# Supplementary material for: Effects of xylo-oligosaccharide and flavomycin on the immune function of broiler chickens
Source: PeerJ. 2018 Mar 5;6:e4435. doi: 10.7717/peerj.4435 (PMC5842763; doi:10.7717/peerj.4435)
Supplement: File S1 — Five replicates data of each index at the age of 21 and 42 days of age were listed in the different treatment groups. The ordinate is the age and the index, and the abscissa is 3 different treatment groups (five replicates). [file peerj-06-4435-s005.xls]

## Sheet: performance
	1-21 d				1-42 d
	ADG(g/d)	ADFI(g/d)	FCR		ADG(g/d)	ADFI(g/d)	FCR
1-1-1	33.4571	51.5429	1.54056		51.0048	97.5667	1.91289
1-1-2	32.081	48.9857	1.52694		49.2405	95.2857	1.93511
1-1-3	33.0143	50.819	1.5393		50.7119	97.1167	1.91507
1-1-4	32.2667	49	1.5186		49.1333	94.9095	1.93167
1-1-5	33.9476	51.2048	1.50835		51.3762	97.4405	1.89661
1-2-1	33.8476	51.3524	1.51716		51.819	97.6762	1.88495
1-2-2	32.6048	49.5	1.51818		50.6571	96.6333	1.9076
1-2-3	34.4333	52.9238	1.53699		52.8214	99.4643	1.88303
1-2-4	33.181	49.7667	1.49986		50.4048	97.5071	1.93448
1-2-5	34.9714	52.9857	1.51511		53.4333	100.54	1.88161
1-3-1	34.9238	52.2905	1.49727		53.3095	101.043	1.8954
1-3-2	32.3238	49.1857	1.52166		52.1929	98.9048	1.89499
1-3-3	34.1381	52.0667	1.52518		54.0167	103.179	1.91012
1-3-4	32.7238	49.881	1.5243		52.531	99.3452	1.89118
1-3-5	33.1048	51.0429	1.54186		54.1881	102.824	1.89754

## Sheet: SCFA
	Acetate(μmol/g)			Propionate(μmol/g)			Butyrate(μmol/g)
	21 d	42 d		21 d	42 d		21 d	42 d
1-1-1	47.55	59.29		8.05	7		6.27	8.22
1-1-2	51.19	61.45		7.63	7.76		6.65	7.27
1-1-3	48.36	62.03		8.76	6.41		6.82	7.45
1-1-4	52.96	54.91		7.59	8.84		7.19	8.56
1-1-5	49.33	57.93		8.72	6.56		7.92	8.86
1-2-1	41.93	46.48		10.13	11.41		7.42	8.55
1-2-2	38.09	40.91		10.9	11.19		6.99	8.57
1-2-3	43.17	44.72		10.38	15.38		6.81	7.94
1-2-4	42.18	43.82		9.38	10.16		7.19	7.64
1-2-5	44.9	36.79		10.17	16.23		6.54	8.16
1-3-1	52.6	81.46		8.44	9.6		9.44	11.67
1-3-2	55.44	67.71		8.36	7.95		10.57	11.46
1-3-3	57.78	75.32		8.58	9.66		8.85	10.94
1-3-4	56.34	79.44		10.7	9.58		9.71	10.36
1-3-5	53.86	69.8		9.03	8.36		10.5	12.14

## Sheet: Immune-related factors
	IgG(mg/ml)			IL-2(ng/L)
	21 d	42 d		21 d	42 d
1-1-1	1.91	1.5		171.09	203.54
1-1-2	2.14	1.62		184.25	208.49
1-1-3	2.26	1.43		173.96	190.46
1-1-4	1.88	1.4		162.63	235.71
1-1-5	1.95	1.65		161.33	238.69
1-2-1	2.16	1.36		130.88	167.23
1-2-2	2.26	1.42		134.61	136.71
1-2-3	2.14	1.15		171.64	182.44
1-2-4	2.03	1.39		154.68	176.05
1-2-5	2.38	1.24		147.37	128.94
1-3-1	2.55	1.36		158.32	216.55
1-3-2	2.19	1.52		149.83	198.06
1-3-3	2.48	1.83		190.42	254.73
1-3-4	2.29	1.69		177.68	217.48
1-3-5	2.73	1.54		182.09	249.63

## Sheet: mRNA relative ratio
	IFNγ			TNFα			TLR5
	21 d	42 d		21 d	42 d		21 d	42 d
1-1-1	1.09278	1.01548		1.02056	0.98129		0.964491	1.03929
1-1-2	0.964598	0.987741		1.01518	1.01525		0.97187	0.964745
1-1-3	0.920964	0.999031		0.985272	1.03429		1.04755	1.01229
1-1-4	0.945572	1.02193		1.01414	0.963548		0.967295	1.02879
1-1-5	1.05617	0.987741		0.981648	0.98129		1.05067	0.962771
1-2-1	0.533545	0.737876		0.714752	0.759573		0.584305	0.771943
1-2-2	0.489676	0.726679		0.742615	0.724762		0.645002	0.788989
1-2-3	0.551287	0.800004		0.78757	0.74039		0.597596	0.798871
1-2-4	0.570966	0.702907		0.742615	0.782275		0.588324	0.753893
1-2-5	0.487738	0.78757		0.633538	0.774028		0.572641	0.727715
1-3-1	0.65386	0.765223		0.699183	0.817741		0.698996	0.793476
1-3-2	0.63515	0.776442		0.735483	0.813507		0.711641	0.775381
1-3-3	0.660642	0.725131		0.671935	0.781473		0.706354	0.800426
1-3-4	0.634514	0.737826		0.671935	0.779842		0.719451	0.781708
1-3-5	0.644838	0.750783		0.727097	0.876816		0.639174	0.76588
